# Supplementary material for: Quantifying Shared and Unique Gene Content across 17 Microbial Ecosystems
Source: PubMed Central journal article supplement (PMC10134805; doi:10.1128/msystems.00118-23), 2023-04-06

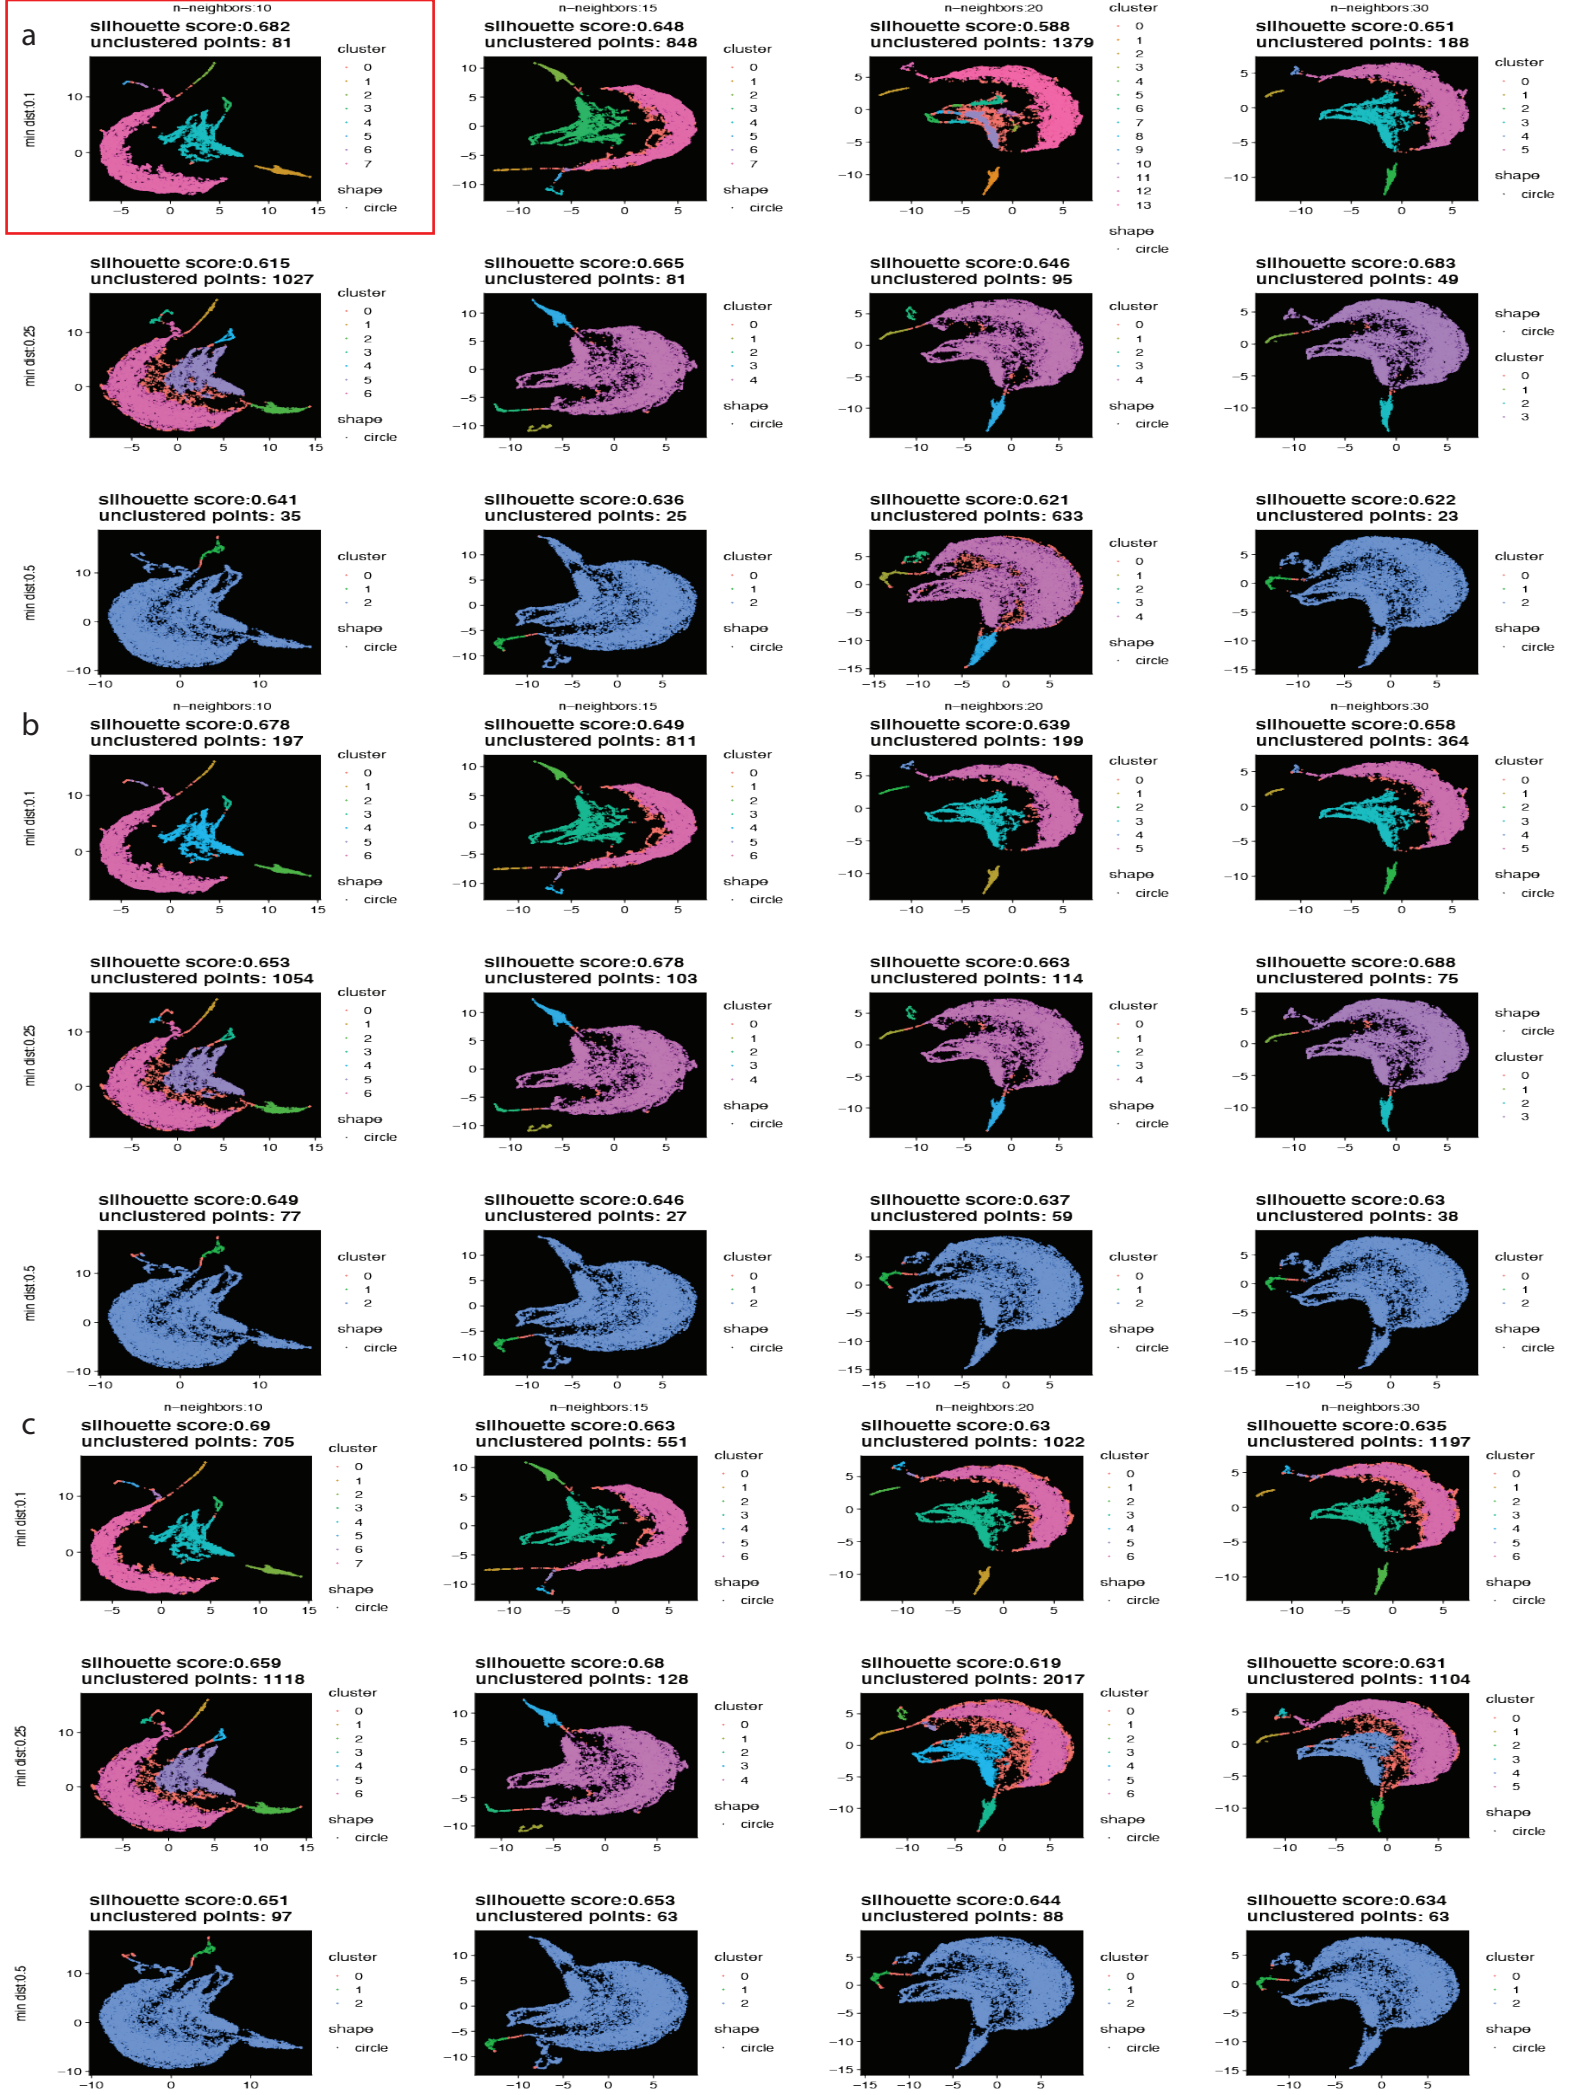

Supplement: msystems.00118-23-s0003.pdf [file msystems.00118-23-s0003.pdf]
