# Supplementary material for: Quantifying Shared and Unique Gene Content across 17 Microbial Ecosystems
Source: PubMed Central journal article supplement (PMC10134805; doi:10.1128/msystems.00118-23), 2023-04-06
Supplement: msystems.00118-23-s0006.pdf [file msystems.00118-23-s0006.pdf]

Ecology

Age

Westernization

Cluster 2

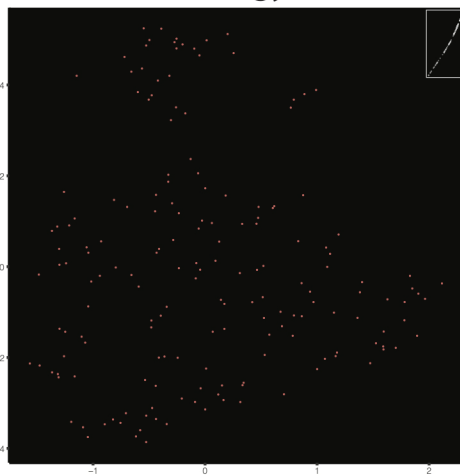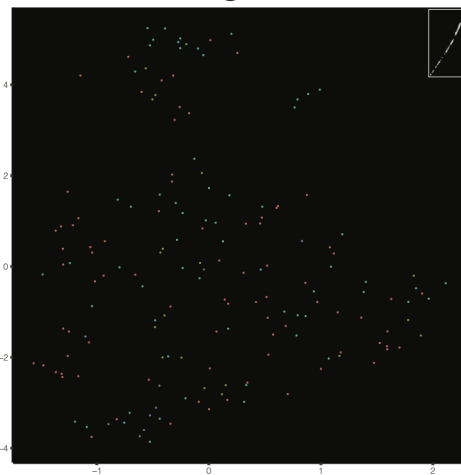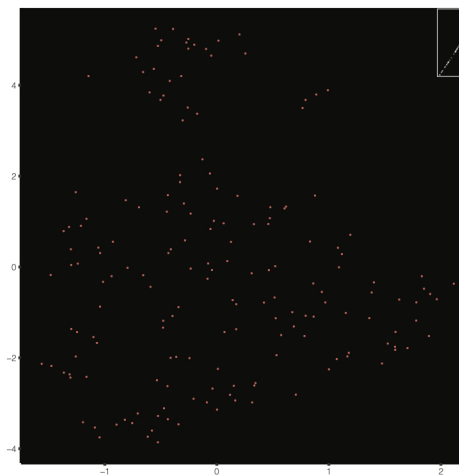

Cluster 3

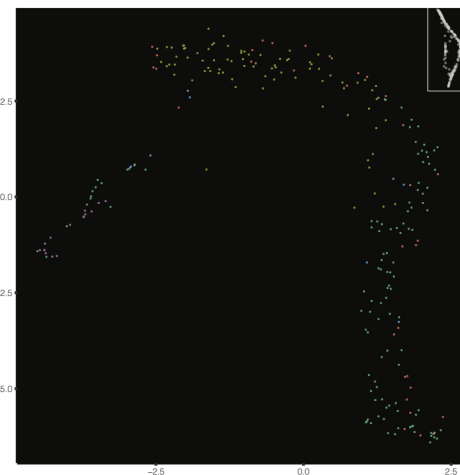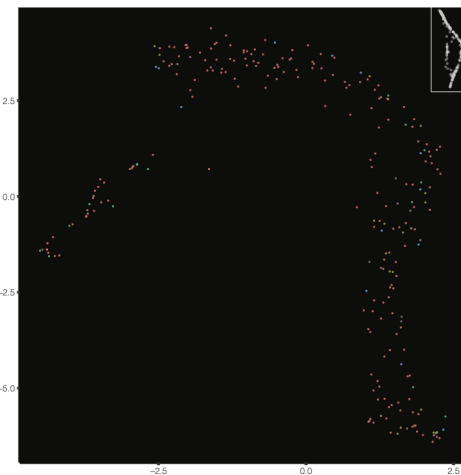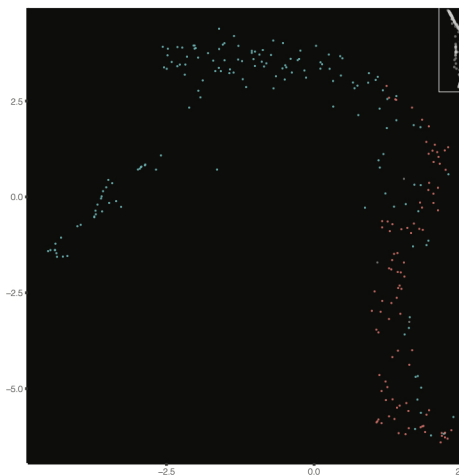

Cluster 4

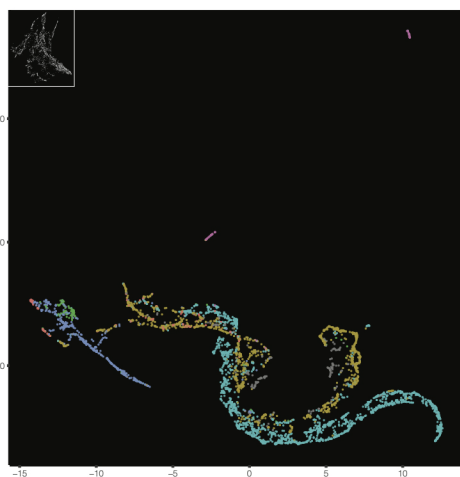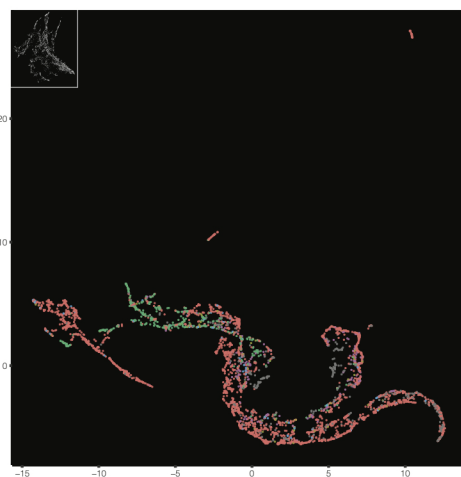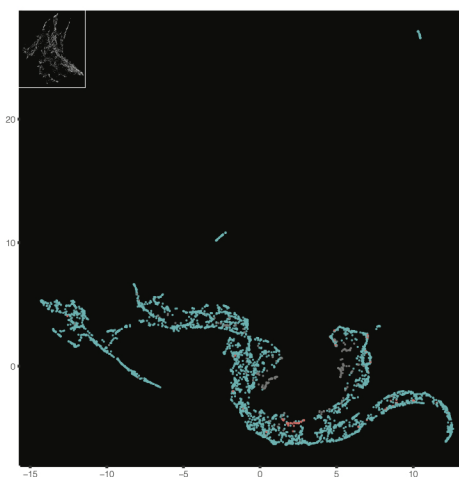

Cluster 7

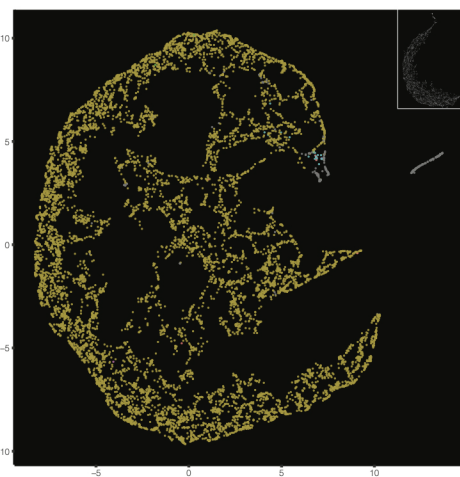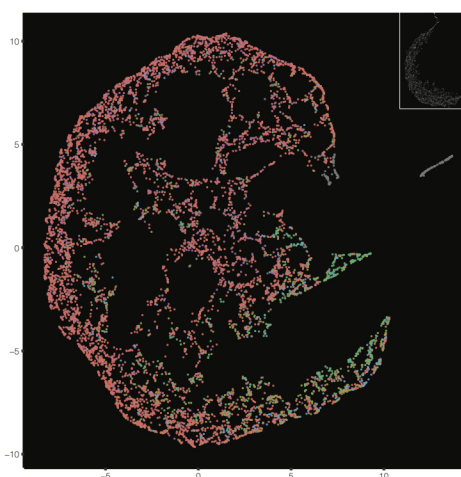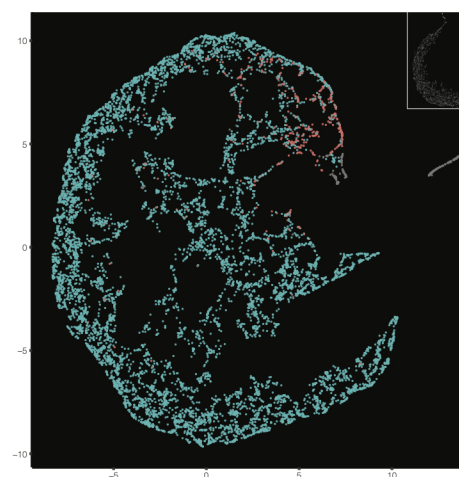

■ human gut    ■ human oral    ■ human nasal  
■ human airways    ■ human skin    ■ human vaginal  
■ other

■ adult    ■ child    ■ newborn  
■ school age    ■ senior    ■ NA

■ westernized    ■ non-westernized    ■ NA
